# Supplementary material
Source: PubMed Central journal article supplement (PMC4426750)
Supplement: jcbfm2014204x1.pdf [file jcbfm2014204x1.pdf]

Supplementary information

## **Deciphering of mitochondrial cardiolipin oxidative signaling in cerebral ischemia-reperfusion**

Jing Ji, PhD\*; Sophie Baart, BS\*; Anna S. Vikulina, PhD; Robert S.B. Clark, MD; Tamil S. Anthonymuthu, PhD; Vladimir A. Tyurin, PhD; Lina Du, MD; Claudette M. St Croix, PhD; Yulia Y. Tyurina, PhD; Jesse Lewis, BS; Erin M. Skoda, PhD; Anthony E. Kline, PhD; Patrick M. Kochanek, MD; Peter Wipf, PhD; Valerian E. Kagan, PhD; Hülya Bayır, MD<sup>#</sup>

Departments of Critical Care Medicine, Environmental and Occupational Health, Physical Medicine & Rehabilitation, Chemistry, Safar Center for Resuscitation Research, Center for Free Radical and Antioxidant Health, University of Pittsburgh, Pittsburgh, PA, USA. Medical School at VU Medical Centre Amsterdam, Netherlands

<sup>#</sup> Correspondence— Dr. Hülya Bayır, Departments of Critical Care Medicine and Environmental and Occupational Health, University of Pittsburgh, 3434 Fifth Avenue, Pittsburgh, PA 15213, USA. E-mail: bayihx@ccm.upmc.edu

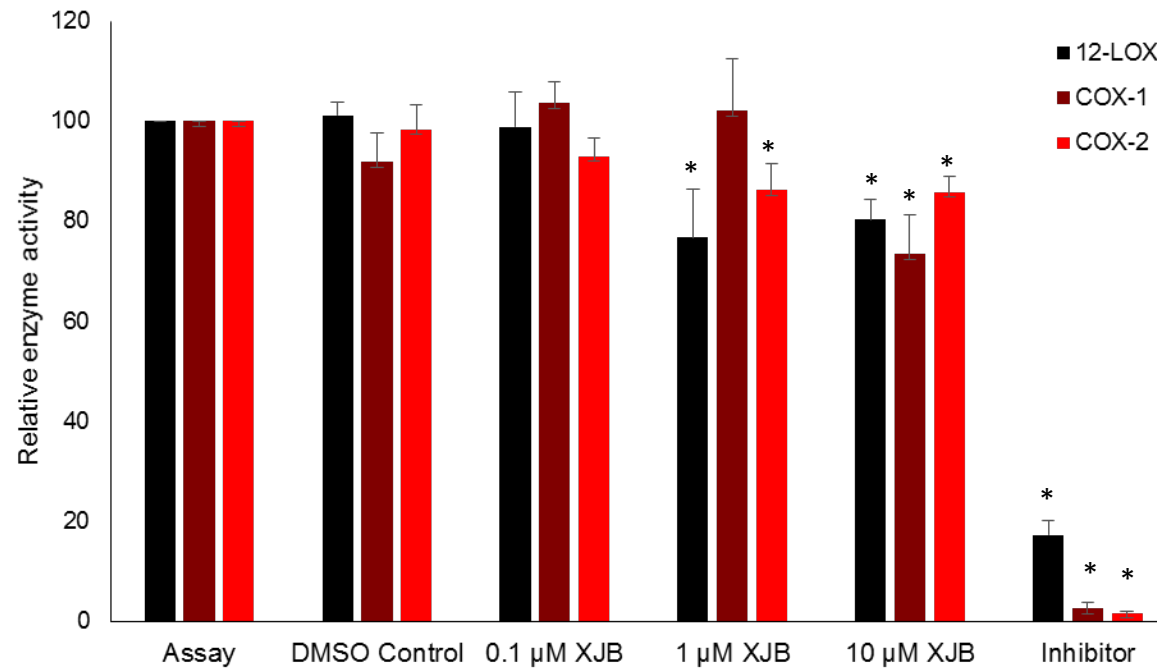

**Figure S1.** Effect of XJB-5-131 (XJB) on enzymatic activity of cyclooxygenase (COX) 1 and 2 and 12-lipoxygenase (LOX). Linoleic acid (20 μM) was incubated with recombinant mouse 12-LOX, recombinant human COX-1 or COX-2 for 30 minutes with various concentrations of XJB and LOX and COX specific inhibitors, licoferone and piroxicam (10 μM each), respectively. DMSO control corresponds to 0.5% DMSO as in all other XJB and inhibitor experiments. All the values are relative to the control activity of corresponding enzyme and average of three experiments. \* $P < 0.05$  vs. Assay and DMSO control.

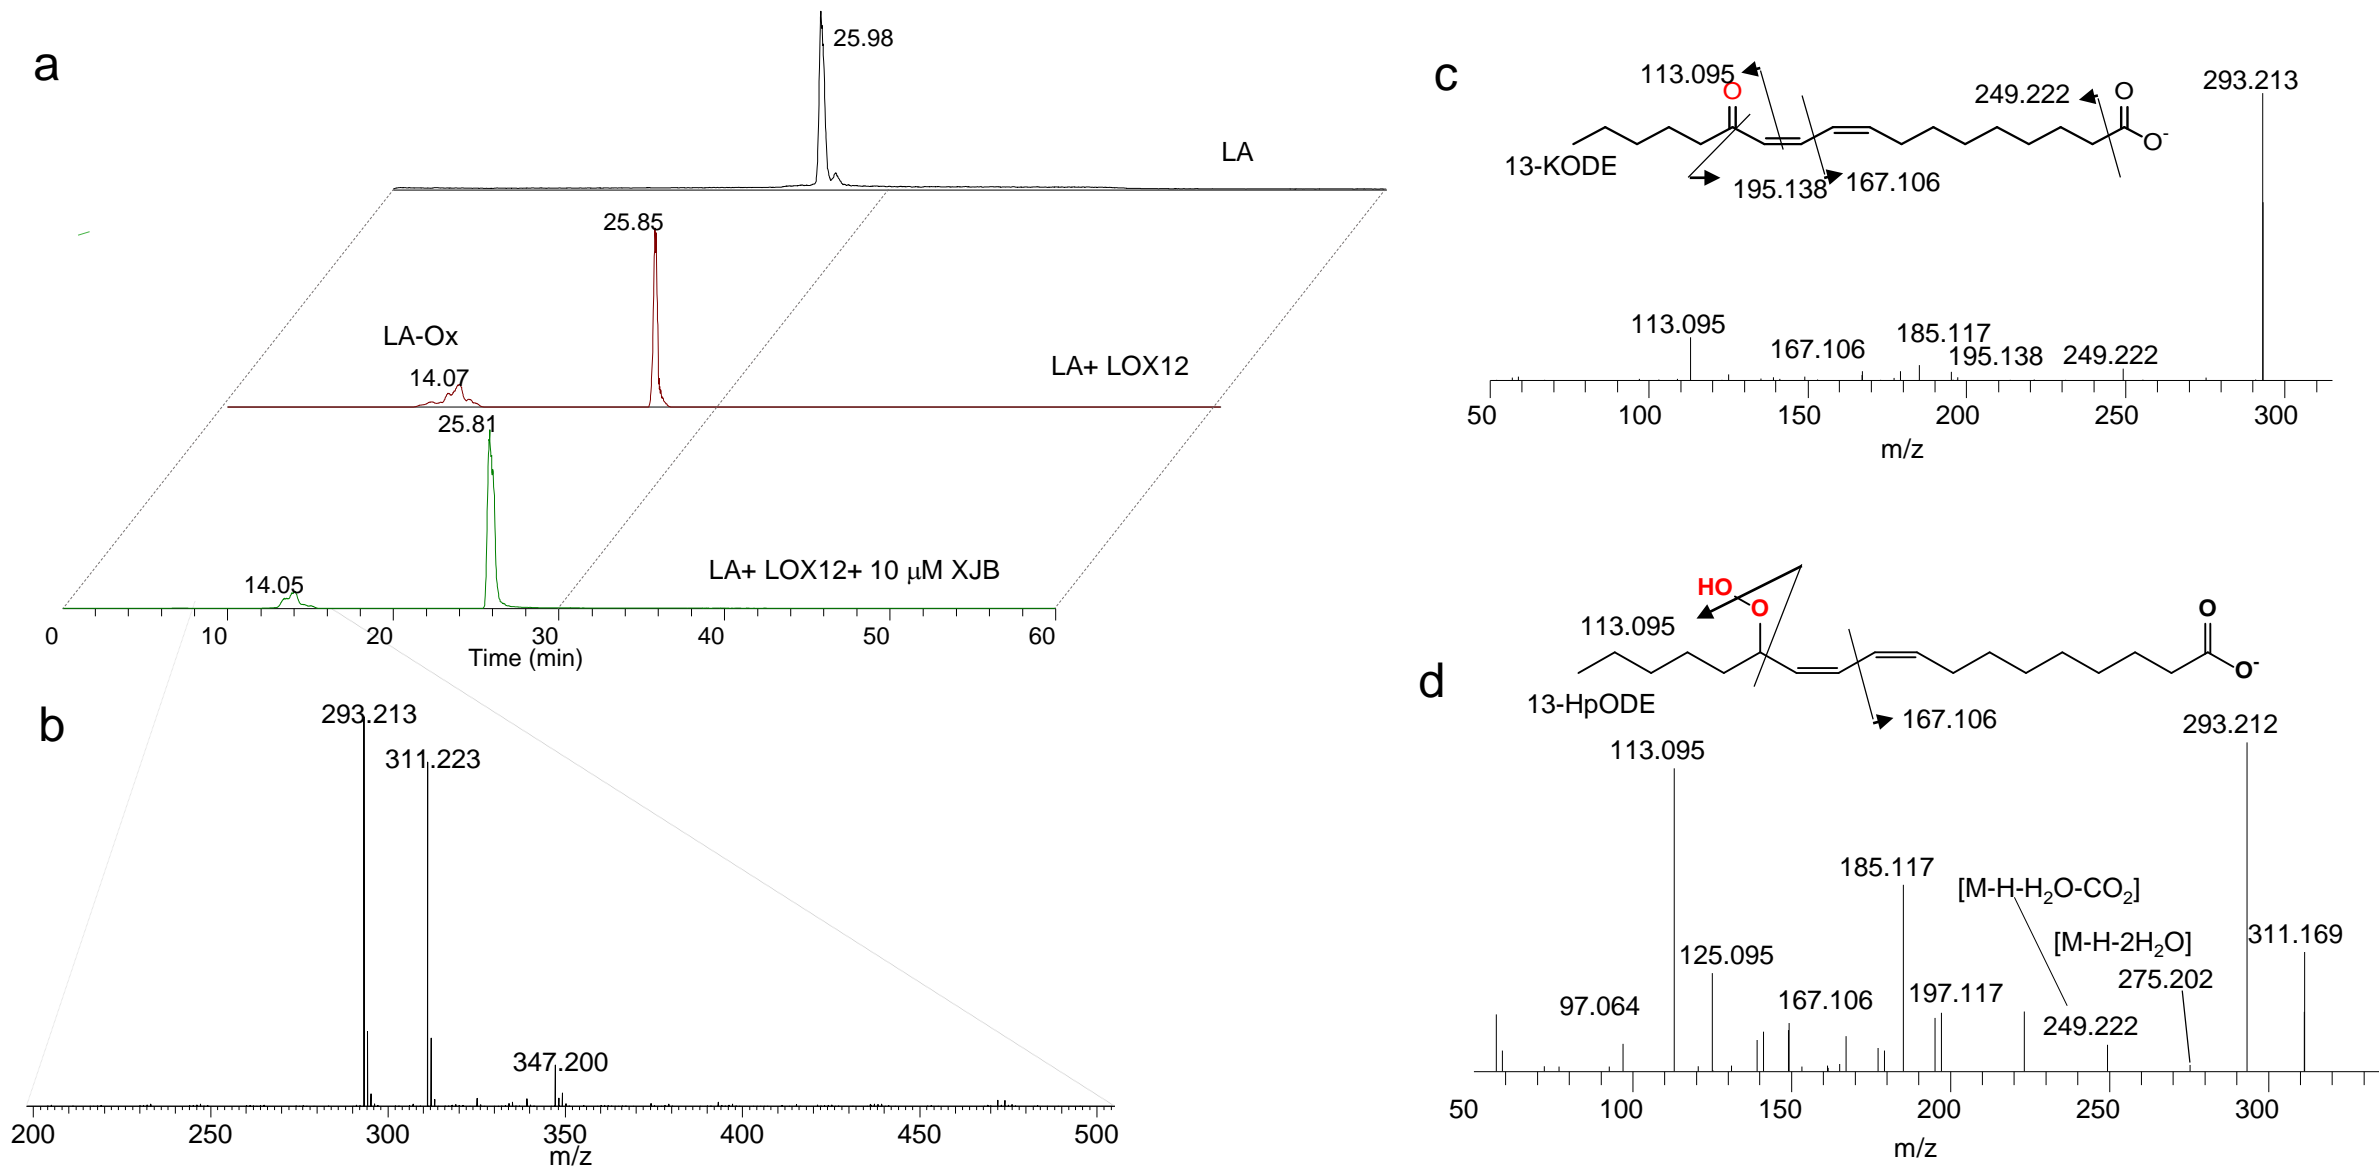

**Figure S2.** Linoleic acid (LA) oxidation using recombinant 12-lipoxygenase (LOX) and the effect of XJB-5-131 (XJB). The chromatogram of LA, LA incubated with 12-LOX, LA incubated with 12-LOX and 10  $\mu$ M of XJB (**a**). The Mass spectrum showed  $m/z$  293.213, and 311.223 as the major oxidation products (**b**). These were further confirmed as 13-KODE and 13 HpODE respectively by fragmentation (**c, d**).

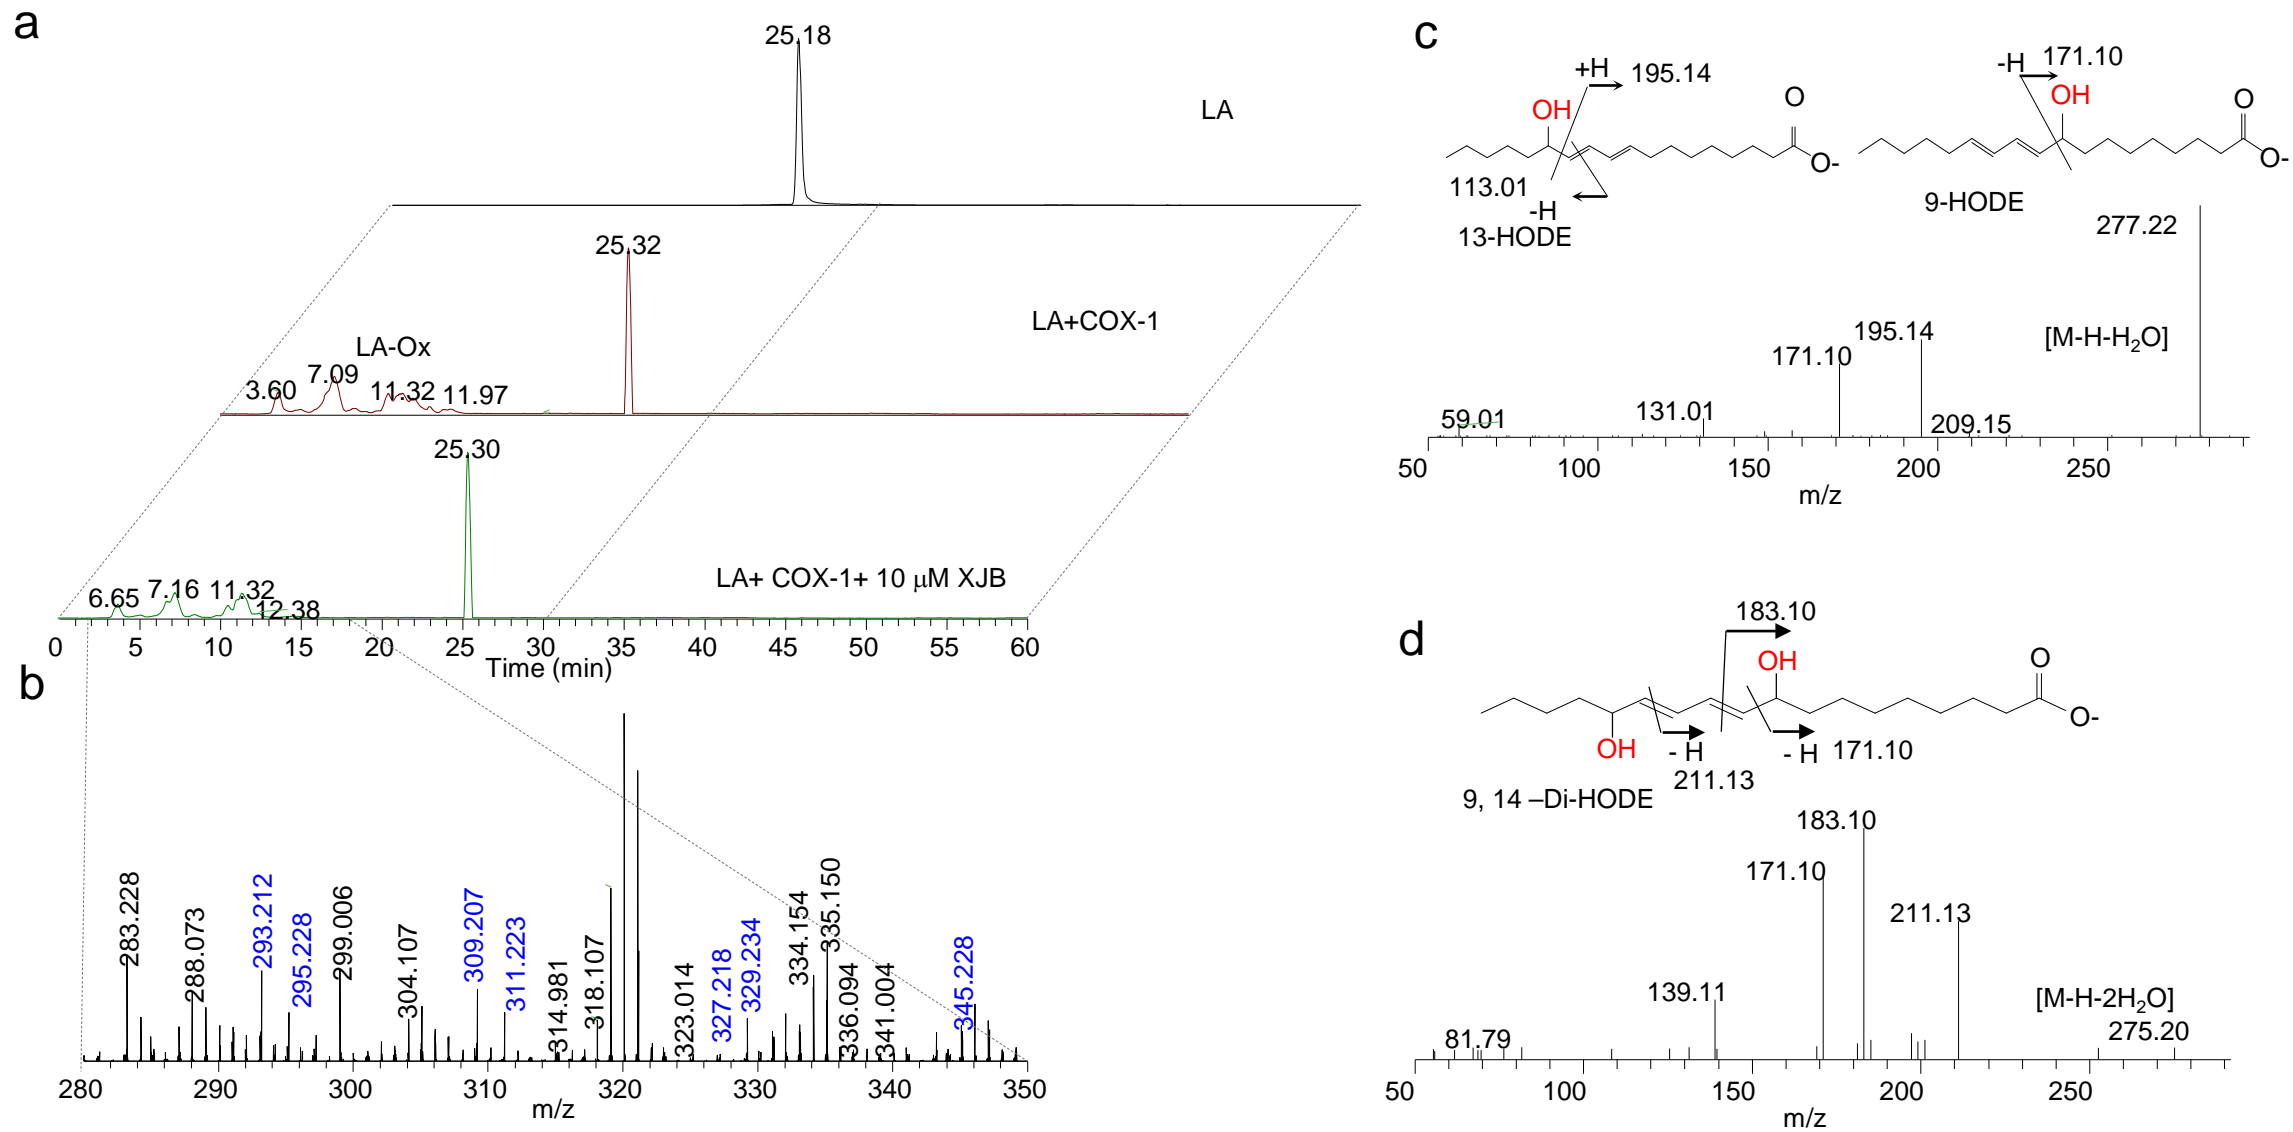

**Figure S3.** Linoleic acid (LA) oxidation using recombinant COX-1 and the effect of XJB-5-131 (XJB). The chromatogram of LA, LA incubated with COX-1, LA incubated with COX-1 and 10  $\mu$ M of XJB (**a**). The Mass spectrum showed various oxidation products such as KODE (293.212), HODE (295.228), EpOME (295.228), HpOME (311.223), DiHODE (311.223), (marked with blue labels) (**b**). The  $m/z$  295.228 ion was further identified as 13-HODE and 9-HODE (**c**) and 311.223 as (9, 14, DiHODE) by fragmentation (**d**).

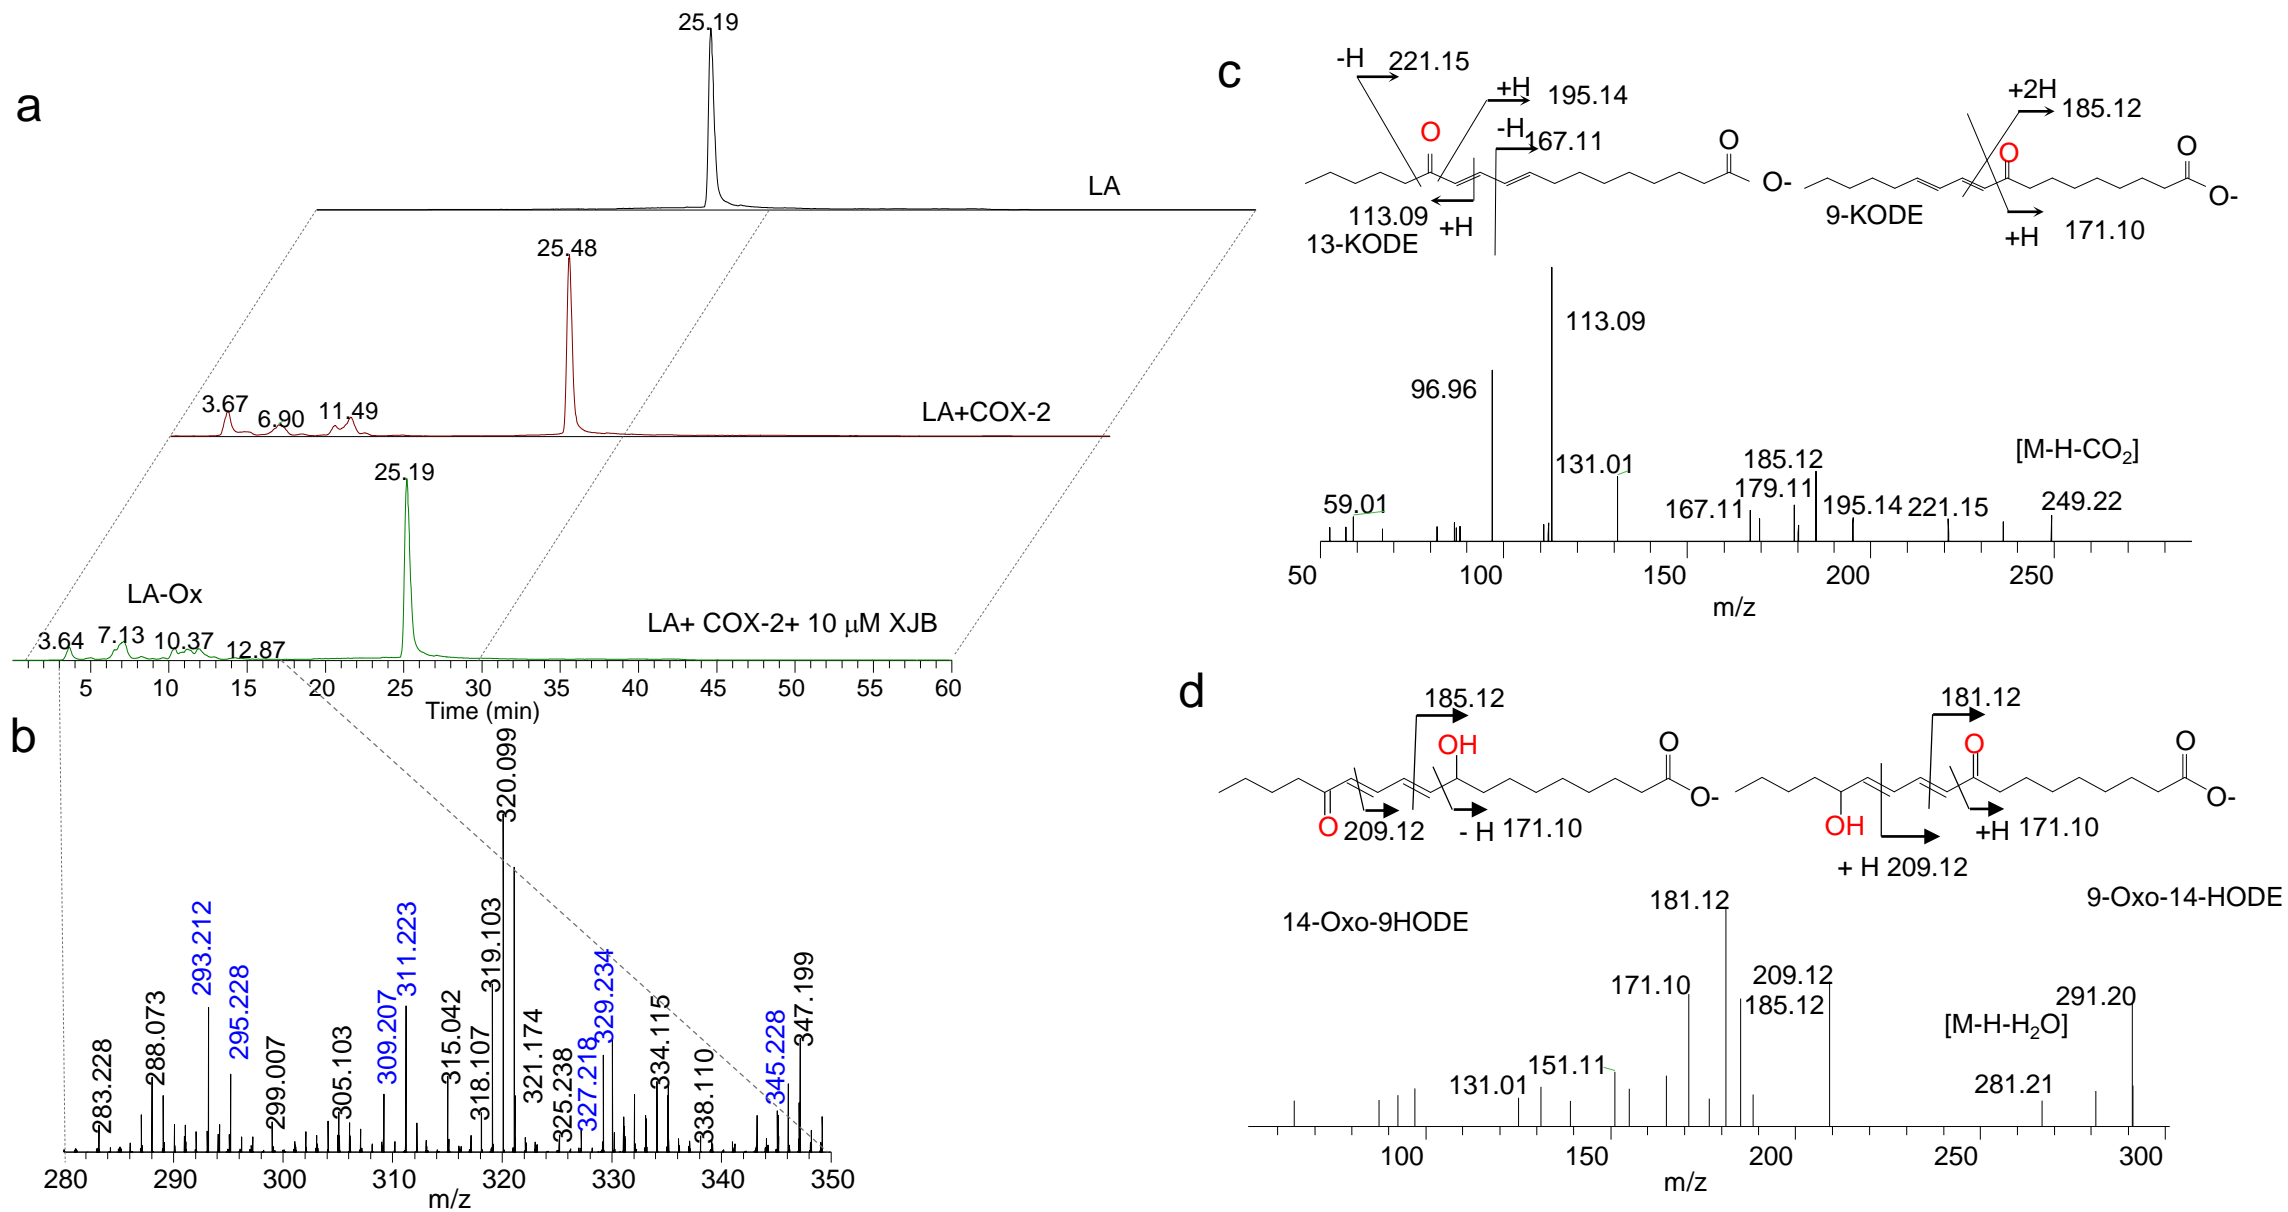

**Figure S4.** Linoleic acid (LA) oxidation using recombinant COX-2 and the effect of XJB-5-131 (XJB). The chromatogram of LA, LA incubated with COX-2, LA incubated with COX-2 and 10  $\mu\text{M}$  of XJB (**a**). The Mass spectrum showed various oxidation products such as KODE (293.212), HODE (295.228), EpOME (295.228), HpOME (311.223), DiHODE (311.223) (marked with blue labels) (**b**). The  $m/z$  293.212 ion was further identified as 13-kODE and 9-KODE (**c**) and 309.207 as (9-Oxo-14-HODE) and (14-Oxo-19-HODE) by fragmentation (**d**).
